# Supplementary material for: Ancestral Haplotype Reconstruction in Endogamous Populations using Identity-By-Descent
Source: bioRxiv or medRxiv preprint supplement (doi:10.1101/2020.01.15.908459), 2020-10-12
Supplement: Supplementary file [file media-1.pdf]

# Supplementary Material

## Ancestral Haplotype Reconstruction in Endogamous Populations using Identity-By-Descent

Kelly Finke<sup>1,2</sup>, Michael Kourakos<sup>1</sup>, Gabriela Brown<sup>1</sup>, Yuval B. Simons<sup>3</sup>, Alejandro A. Schäffer<sup>4</sup>,  
Rachel L. Kember<sup>5</sup>, Maja Bućan<sup>5</sup>, Sara Mathieson<sup>6,†</sup>

<sup>1</sup> Department of Computer Science, Swarthmore College, Swarthmore, PA

<sup>2</sup> Department of Biology, Swarthmore College, Swarthmore, PA

<sup>3</sup> Department of Genetics, Stanford University, Stanford, CA

<sup>4</sup> Cancer Data Science Laboratory, National Cancer Institute, NIH, Bethesda, MD

<sup>5</sup> Department of Genetics, University of Pennsylvania, Philadelphia, PA

<sup>6</sup> Department of Computer Science, Haverford College, Haverford, PA

† Corresponding author: Sara Mathieson, [smathieson@haverford.edu](mailto:smathieson@haverford.edu)

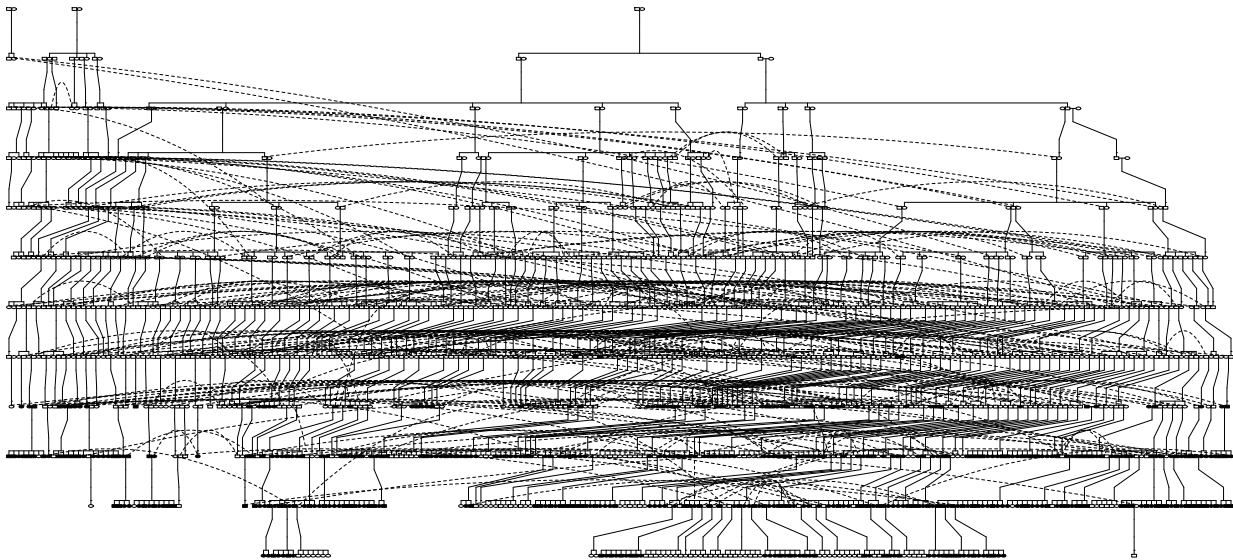

Figure S1: *Pedigree structure: 1338 individuals over 10 generations. Squares represent males and circles represent females. Dotted lines connect the same individual appearing in two different parts of the pedigree. Filled in symbols represent genotyped individuals.*

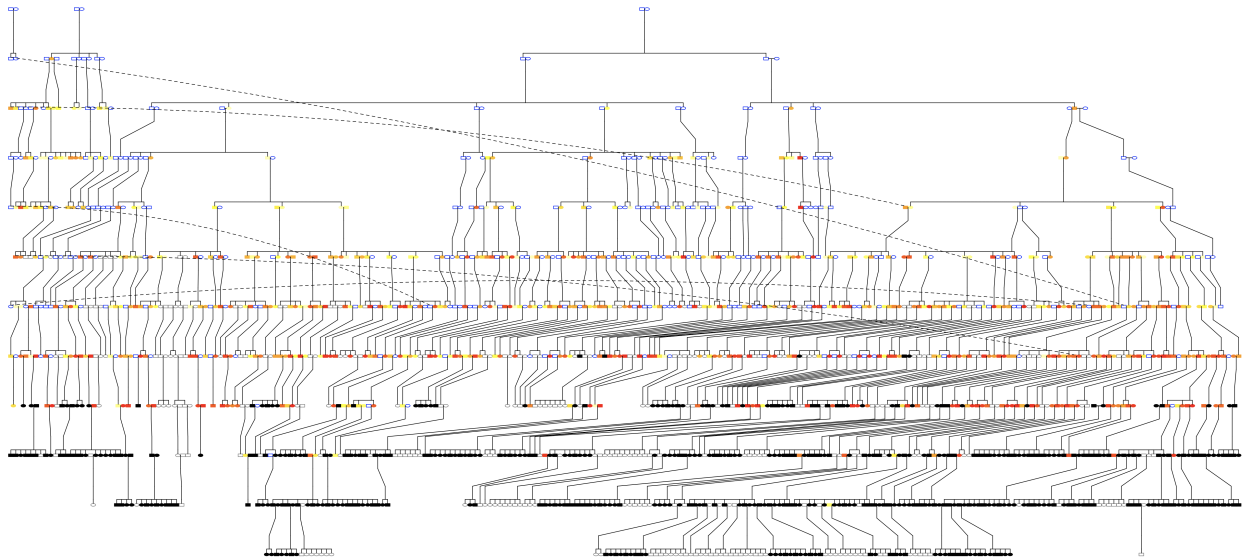

Figure S2: *Position of reconstructed individuals in the pedigree: colors are as follows. Black: genotyped individual, white: no genotyped descendants, yellow-red heatmap: represents number of chromosomes reconstructed, blue: no chromosomes reconstructed. Dotted lines are thinned for clarity, but are the same as in Figure S1.*

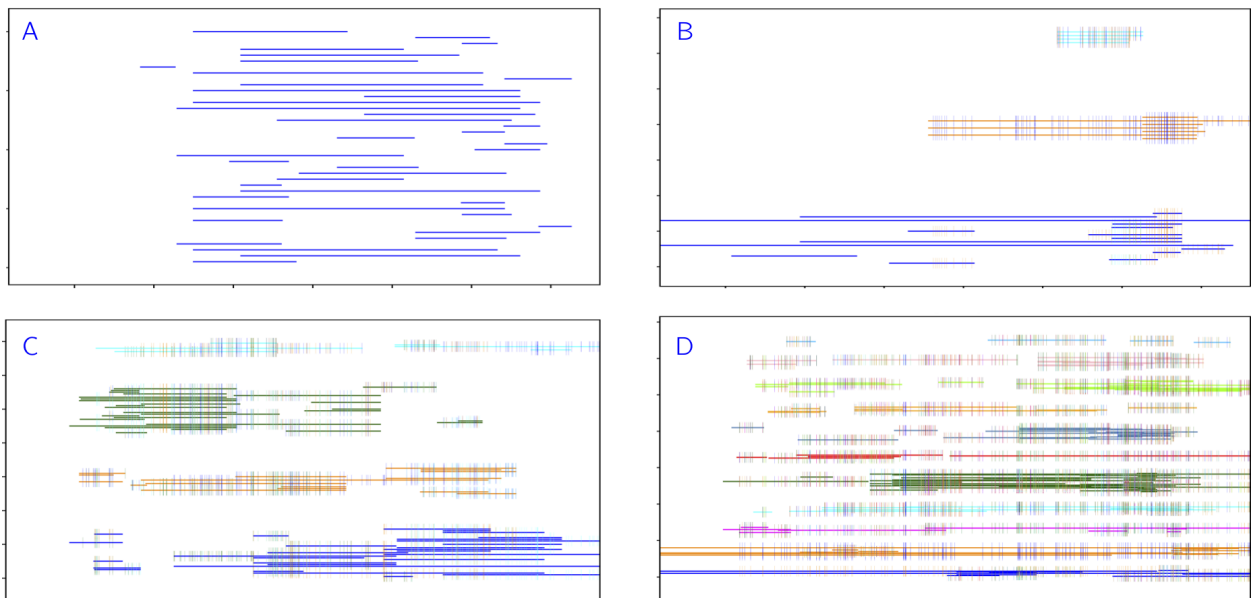

Figure S3: *Unsuccessful reconstruction examples: A) Occasionally we only build one haplotype. B) Sometimes we have a fairly strong reconstruction, but due to the presence of other groups it does not meet our threshold for two strong group. C) Four groups may indicate ambiguity with a spouse or other close relative. D) Sometimes we see many groups and cannot resolve the individual.*

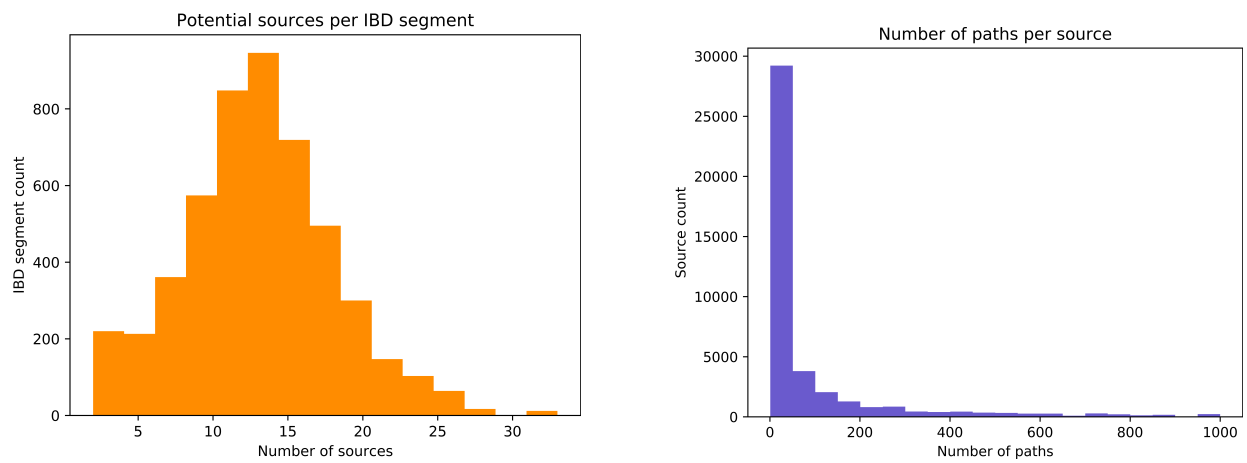

Figure S4: *Source and path distributions for chromosome 21. (left) Distribution of the number of potential sources per IBD segment. (right) Number of paths per source (truncated at 1000, but there is an extremely long tail).*

---

**Algorithm 1:** Overview

---

**Input:**  $G$  = genotyped individuals,  $NG$  = non-genotyped individuals,  $\mathcal{P}$  = pedigree tree relating all individuals in  $G$  and  $NG$

**Output:**  $R$  = reconstructed individuals,  $\mathcal{G}_p$  = groups for each individual  $p \in R$

find IBDs shared between  $G$  using GERMLINE

**for**  $I_k \in \text{IBDs}$  **do**

$C_k$  = cohort of individuals from  $G$  sharing  $I_k$

$S_k$  = sources of  $C_k$  (Algorithm 2)

$d_k(s)$  = number of descendance paths for each  $s \in S_k$  (Algorithm 2)

**end**

$R = G$

$IS$  = list of IBDs to source

**while**  $R$  not changing and  $IS$  not empty **do**

**for**  $I_k \in IS$  **do**

**while** assignment unsuccessful and  $S_k$  is not empty **do**

            selected source  $s^* = \arg \min_s d_k(s)$

**if**  $d_k(s^*) > \text{path threshold}$  **then**

                | ignore  $I_k$

**end**

**else**

                individuals  $D_k(s^*)$  = all individuals lying on each path from  $s^*$  to  $C_k$

                assign  $I_k$  to all individuals in  $D_k(s^*)$

**if**  $I_k$  conflicts with reconstructed individual in  $D_k(s^*)$  **then**

                    | remove  $I_k$  from all  $D_k(s^*)$

                    | remove  $s^*$  from  $S_k$

                    | assignment round is unsuccessful

**end**

**end**

**end**

**end**

    reset  $IS$  to empty list

**for** individual  $p \in NG$  **do**

$\mathcal{G}_p$  = reconstructed haplotype groups (Algorithm 3)

**if** exactly 2 strong groups in  $\mathcal{G}_p$  **then**

            | add  $p$  to  $R$

**end**

**if** 2 strong groups and one or more weak groups in  $\mathcal{G}_p$  **then**

            | remove weak groups from  $\mathcal{G}_p$

            | add all IBDs from weak groups to  $IS$

            | add  $p$  to  $R$

**end**

**end**

**end**

**return**  $R$ ,  $\mathcal{G}_p$  for each  $p \in R$

---

---

**Algorithm 2:** Source and Descendance Path Finding

---

**Input:**  $C$  = a cohort of individuals sharing a single IBD,  $\mathcal{P}$  = pedigree tree containing relationships between individuals

**Output:**  $S$  = a list of possible non-redundant sources for cohort  $C$

queue  $Q = \text{list}(C)$

**for** cohort member  $p \in C$  **do**

    | multiset  $M_p = \{p\}$

**end**

**while**  $Q$  is not empty **do**

    | individual  $p = Q.\text{pop}$

**if**  $p$  is married-in **then**

        | skip the following (married-in have no known ancestors)

**end**

**if**  $p^{(f)}$  has not been processed **then**

        | father's multiset  $M_f = M_p$

        | father's children set  $Ch_f = p$

        | add father to  $Q$

**end**

**else**

        | extend father's multiset  $M_f$  by  $M_p$

        | add  $p$  to father's children set  $CH_f$

        | add  $M_p$  and  $p$  to  $M$  and  $CH$  of any processed ancestors of father

**end**

    repeat process for  $p^{(m)}$

**end**

sources  $S$  = all individuals  $p$  s.t.  $M_p$  contains all  $c \in C$

**for** source  $s \in S$  **do**

    |  $M_{chmax} = \text{largest } M_{ch} \text{ for } ch \in CH_s$

**if** length of  $M_s = M_{chmax}$  **then**

        | remove redundant source  $s$  from  $S$

**end**

**end**

**for** source  $s \in S$  **do**

**if**  $s.\text{spouse}$  in  $S$  and  $M_s = M_{s.\text{spouse}}$  **then**

        | remove  $s$  and  $s.\text{spouse}$  from  $S$

        | add couple  $s$  &  $s.\text{spouse}$  to  $S$ , s.t.  $M = M_s$  and  $CH = CH_s$

**end**

**end**

**for** source  $s \in S$  **do**

    | number of descendance paths  $d(s) = \prod_{c \in C} m_s(c)$ , where  $m_s(c)$  = multiplicity of  $c$  in  $M_s$

**end**

**return**  $S$  and  $d(s)$  for all  $s \in S$

---

---

**Algorithm 3:** Grouping

---

**Input:**  $R$  = genotyped or reconstructed individuals,  $A$  = non-reconstructed individuals, ungrouped IBDs  $\mathcal{I}_p$  have been placed in each individual  $p$

**Output:**  $\mathcal{G}_p$  = groups for each individual  $p$

**for** *individual*  $p \in R$  **do**

**for** IBD  $I \in \mathcal{I}_p$  **do**

        | add  $I$  to one or both groups in  $\mathcal{G}_p$  depending on zygosity

**end**

**end**

**for** *individual*  $p \in A$  **do**

    find any homozygous groups  $\mathcal{G}_p^{(o)}$

    use overlapping IBDs in  $\mathcal{I}_p$  to build heterozygous groups  $\mathcal{G}_p^{(e)}$

    duplicate groups in  $\mathcal{G}_p^{(o)}$  and create  $\mathcal{G}_p = \mathcal{G}_p^{(o)} \cup \mathcal{G}_p^{(e)}$

    remove all IBDs from  $\mathcal{S}_p$  that were used to build groups in  $\mathcal{G}_p$

**for** *pairs of groups*  $G_i, G_j \in \mathcal{G}_p$  *and remaining IBD*  $I \in \mathcal{I}_p$  **do**

        | **if**  $I$  overlaps  $G_i$  and  $G_j$  sufficiently **then**

            | merge  $G_j$  into  $G_i$  and delete  $G_j$

        | **end**

**end**

**for** *pairs of groups*  $G_i, G_j \in \mathcal{G}_p$  **do**

        | **if**  $G_i$  and  $G_j$  overlap or “line up” **then**

            | merge  $G_j$  into  $G_i$  and delete  $G_j$

        | **end**

**end**

**end**

---
